# Supplementary material
Source: Springer Nature journal article supplement (https://www.springermedizin.de/resource/supplementary/12985_2010_1043_MOESM1_ESM.pdf/9609014)

OD450

2.8  
2.4  
2.0  
1.6  
1.2  
.8  
.4  
0.0

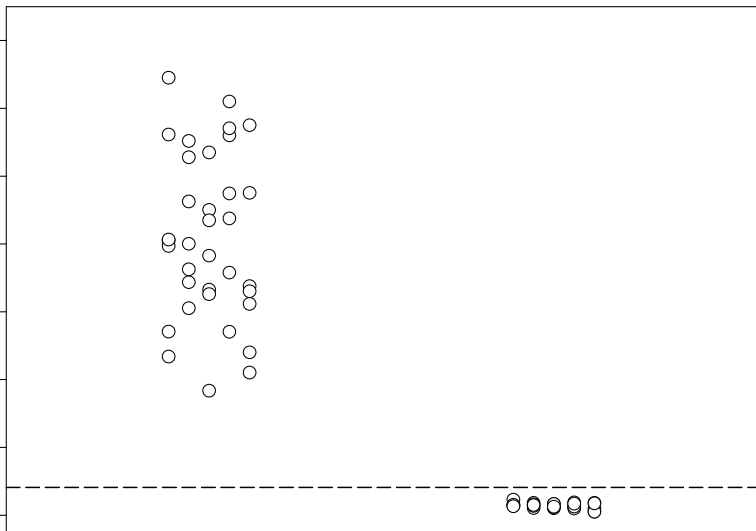

SARS patient sera

Healthy donor sera

Supplement: MOESM1 [file 9609014]
